# Supplementary material
Source: MDPI journal article supplement (https://www.mdpi.com/2311-5637/8/9/467)
Supplement: s1 [file s1]

## Supplementary materials

### Comparative fatty acid compositional profiles of *Rhodotorula toruloides* haploid and diploid strains under various storage conditions

Yue Zhang<sup>1,2</sup>, Rasool Kamal<sup>1</sup>, Qing Li<sup>1</sup>, Xue Yu<sup>1</sup>, Qian Wang<sup>1,3\*</sup>, Zongbao Kent Zhao<sup>1,3</sup>

<sup>1</sup>Laboratory of Biotechnology, Dalian Institute of Chemical Physics, CAS, Dalian 116023, China

<sup>2</sup>School of Chemical Engineering, University of the Chinese Academy of Sciences, 19A Yuquan Road, Beijing 100049, China

<sup>3</sup>Dalian Key Laboratory of Energy Biotechnology, Dalian Institute of Chemical Physics, CAS, Dalian 116023, China

**\*Corresponding author:** Dalian Institute of Chemical Physics, CAS, 457 Zhongshan Road, Dalian 116023, China. Tel: +86-0411-84379066; E-mail: wangqian@dicp.ac.cn

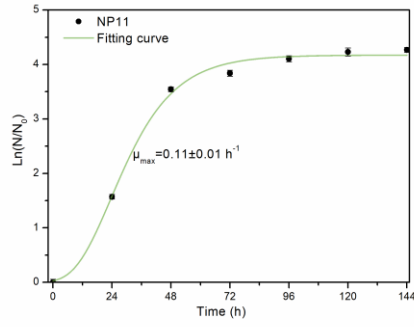

(a)

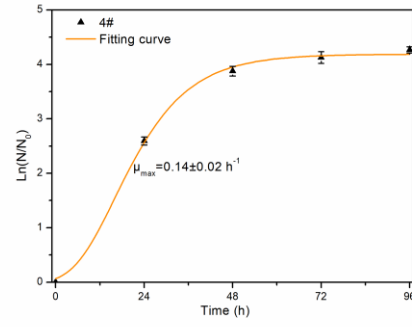

(b)

**Figure S1.** The growth curves fitting of *R. toruloides* NP11 and *R. toruloides* 4# in nitrogen-limited cultivation. (a) The specific growth rate ( $\mu_{\max}$ ) of the haploid strain NP11 growth curve was  $0.11 \pm 0.01 \text{ h}^{-1}$  in nitrogen-limited culture. (b) The specific growth rate ( $\mu_{\max}$ ) of the diploid strain 4# growth curve was  $0.14 \pm 0.02 \text{ h}^{-1}$  in nitrogen-limited culture. The growth curve fitting was performed according to the models described in the previous report [1] by software Origin 8.5.

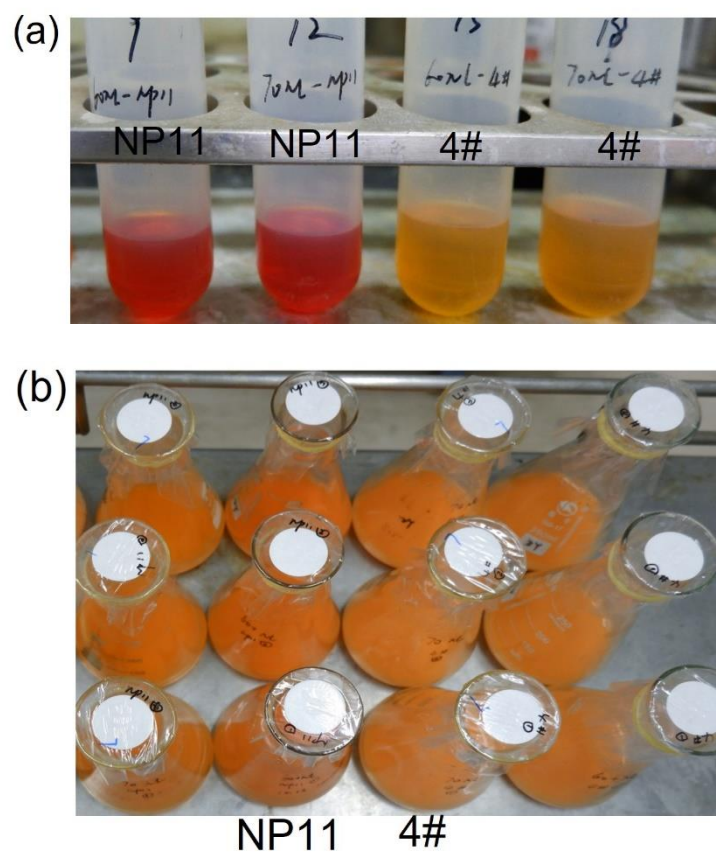

**Figure S2.** The lipid extract and culture broth of the haploid strain *R. toruloides* NP11 and the diploid strain *R. toruloides* 4#. (a) Lipid extraction of NP11 and 4# from left to right by the classical acid heat method. (b) Culture broth of NP11 and 4# from left to right after fermentation for 96 h.

**Table S1.** *p*-value of OD<sub>600</sub> and residual glucose comparison between the haploid strain *R. toruloides* NP11 and the diploid strain *R. toruloides* 4# at different time by statistical analysis. \*\*\*, *p* < 0.001 (*p*-value); \*\*, *p* < 0.01 of one-tailed Student's t-test. All data are presented as mean ± SD of biological triplicates.

| Time<br>(h) | P-value of OD <sub>600</sub><br>comparation | P-value of residual<br>Glucose comparation |
|-------------|---------------------------------------------|--------------------------------------------|
|             | NP11 & 4#                                   | NP11 & 4#                                  |
| 24          | 2.66E-06***                                 | 0.1214                                     |
| 48          | 1.86E-06***                                 | 1                                          |
| 72          | 0.0007***                                   | 7.07E-05***                                |
| 96          | 0.0373**                                    | 0.0001***                                  |

**Table S2.** *p*-value of some strain parameters comparison between the haploid strain *R. toruloides* NP11 and the diploid strain *R. toruloides* 4# by statistical analysis. \*\*\*, *p* < 0.001; \*\*, *p* < 0.01 of one-tailed Student's *t*-test. All data are presented as mean ± SD of biological triplicates.

| parameters               | P-value     |
|--------------------------|-------------|
|                          | NP11 & 4#   |
| Glucose consumption rate | 0.0038**    |
| Cell mass titer          | 0.0001***   |
| Lipid titer              | 0.0029**    |
| Lipid content            | 0.0015**    |
| Lipid yield              | 1.88E-07*** |
| Cell mass yield          | 1.88E-05*** |
| Lipid productivity       | 0.0007***   |
| Cell mass productivity   | 1.02E-05*** |

**Table S3.** *p*-value and FDR of FAMES composition of NP11 under different preservation conditions compared by statistical analysis. \*, *p* < 0.05 of one-tailed Student's t-test. FDR, False Discovery Rate, was the correction of P-value after multiple comparison, \*, FDR < 0.05.

| Fatty acids | 4 °C 1 h        |        | 4 °C 1 h vortex |        | -20 °C 17 h     | -20 °C 17 h vortex | RT 24 h         | RT 72 h         | RT 2 months     |        |
|-------------|-----------------|--------|-----------------|--------|-----------------|--------------------|-----------------|-----------------|-----------------|--------|
|             | <i>p</i> -value | FDR    | <i>p</i> -value | FDR    | <i>p</i> -value | <i>p</i> -value    | <i>p</i> -value | <i>p</i> -value | <i>p</i> -value | FDR    |
| C6:0        | 0.7488          | 4.1184 | 0.9898          | 1.0369 | 0.7757          | 0.7235             | 0.7800          | 0.9501          | 0.2462          | 0.6017 |
| C7:0        | 0.7447          | 5.4612 | 0.7716          | 8.4877 | 0.7083          | 0.7246             | 0.8863          | 0.8107          | 0.6519          | 1.1952 |
| C8:0        | 0.9467          | 1.3885 | 0.9266          | 1.4560 | 0.9128          | 0.8551             | 0.9937          | 0.8647          | 0.8032          | 1.2621 |
| SCFA        | 0.8542          | 2.3491 | 0.9935          | 0.9935 | 0.9325          | 0.9481             | 0.9071          | 0.8822          | 0.5553          | 1.1105 |
| C9:0        | 0.9212          | 1.8423 | 0.8802          | 1.9364 | 0.9905          | 0.9957             | 0.9434          | 0.8289          | 0.9076          | 1.0509 |
| C12:0       | 0.7816          | 2.8657 | 0.8399          | 3.0797 | 0.3740          | 0.7664             | 0.6474          | 0.7743          | 0.1153          | 0.6342 |
| MCF         | 0.9451          | 1.4851 | 0.8746          | 2.1379 | 0.9220          | 0.9811             | 0.9866          | 0.8684          | 0.8205          | 1.1282 |
| C14:0       | 0.9344          | 1.7130 | 0.8548          | 2.3506 | 0.9978          | 0.8273             | 0.7690          | 0.6150          | 0.8820          | 1.0780 |
| C15:0       | 0.9674          | 1.1202 | 0.8500          | 2.6713 | 0.9130          | 0.7646             | 0.9963          | 0.6855          | 0.9908          | 0.9908 |
| C16:1       | 0.6758          | 7.4335 | 0.9382          | 1.2900 | 0.3283          | 0.4448             | 0.1848          | 0.4840          | 0.4425          | 0.9735 |
| C16:0       | 0.9719          | 4.1184 | 0.9866          | 1.0852 | 0.9908          | 0.9108             | 0.9225          | 0.9739          | 0.6733          | 1.1393 |
| C17:1       | 0.0234*         | 0.5149 | 0.0111*         | 0.2443 | 0.8579          | 0.9728             | 0.8903          | 0.8504          | 0.2338          | 0.7348 |
| C17:0       | 0.9821          | 5.4612 | 0.9833          | 1.1386 | 0.8675          | 0.9303             | 0.6949          | 0.7031          | 0.8718          | 1.1283 |
| C18:2       | 0.9575          | 1.1703 | 0.9449          | 1.2229 | 0.8637          | 0.8500             | 0.8010          | 0.9876          | 0.8163          | 1.1973 |
| C18:1       | 0.9151          | 2.0132 | 0.9127          | 1.5445 | 0.9864          | 0.9792             | 0.9856          | 0.9751          | 0.9129          | 1.0042 |
| C18:0       | 0.7630          | 3.3572 | 0.7809          | 5.7264 | 0.8560          | 0.8632             | 0.9920          | 0.7609          | 0.9539          | 0.9993 |
| LCFA        | 0.9380          | 1.5874 | 0.9278          | 1.3607 | 0.9074          | 0.7688             | 0.8559          | 0.8024          | 0.2154          | 0.7897 |
| C20:0       | 0.8793          | 2.1494 | 0.9748          | 1.1914 | 0.4868          | 0.3395             | 0.3355          | 0.5715          | 0.1018          | 0.7462 |
| C22:0       | 0.9548          | 1.2356 | 0.9120          | 1.6720 | 0.3487          | 0.7263             | 0.4569          | 0.3597          | 0.0199*         | 0.4368 |
| C23:0       | 0.8090          | 2.5424 | 0.7815          | 4.2983 | 0.5489          | 0.1736             | 0.3115          | 0.4385          | 0.2377          | 0.6536 |
| C24:0       | 0.9700          | 1.0670 | 0.8098          | 3.5630 | 0.7861          | 0.8032             | 0.6360          | 0.5945          | 0.1836          | 0.8080 |
| VLCF        | 0.9477          | 1.3031 | 0.9092          | 1.8183 | 0.8207          | 0.5289             | 0.6168          | 0.7257          | 0.0506          | 0.5568 |

## Reference

1. Zwietering, M. H., Jongenburger, I., Rombouts, F. M., and Riet, K. v. t. Modeling of the Bacterial Growth Curve. *Appl. Environ. Microbiol.* **1990**, 56, 1875-1881.
